# Supplementary material
Source: publisher site journal article supplement (https://www.spandidos-publications.com/5012/downloadSupplementary)
Supplement: Supplementary file 1 [file downloadSupplementary]

## Sheet: 20210609
Table SI. Data of patients with ‘single-positive’ hepatocellular carcinoma.
ID	Sex	Age	DCP	AFP (ng/ml)	Hepatitis	ECOG score	Child-Pugh classification	ALT (U/l)	AST (U/l)	Tbil (μmol/l)	HDL (mmol/l)	RBP (mg/l)	PLT (10^9/l)	PCT (%)	PDW (%)	RDW (%)	Tumor size (cm)	Tumor number	N-metastasis	M-metastasis	OS (days)	Status
1	Female	≤60 years	Low-DCP group	3.77	No	0	A	20	31.8	10.9	1.16	43.3	194.1	16	16.46	14.77	7.7	Single	No	No	739	Alive
2	Male	≤60 years	High-DCP group	1.8	Yes	1	B	40.5	38.8	15.1	1.18	31.2	159	16	11.8	12.6	3.2	Multiple	No	No	1229	Alive
3	Male	>60 years	High-DCP group	8.52	Yes	0	A	60.4	78.6	20.3	1.19	19.7	207.1	22	17.07	13.72	12.6	Multiple	No	No	788	Alive
4	Male	≤60 years	High-DCP group	6.85	Yes	1	A	19.4	30.6	6.8	0.77	28	87	11	15.1	13.2	2.5	Multiple	No	No	1159	Alive
5	Male	≤60 years	Low-DCP group	18.94	Yes	1	A	12.2	24.9	25.9	1.71	17.7	93	9	11.5	12.9	1.5	Multiple	No	No	1072	Alive
6	Male	>60 years	High-DCP group	5.38	No	0	A	56.5	34	20.7	1.21	13.6	142.1	16	16.9	13.6	3.3	Single	No	No	785	Alive
7	Male	≤60 years	Low-DCP group	4.24	No	0	A	20	23.4	11.2	1.33	35	75	11	20.9	13.2	6.5	Single	No	No	1299	Alive
8	Male	≤60 years	Low-DCP group	2.18	Yes	0	A	17.5	30.5	22.7	1.72	15.5	127.1	12	17.46	16.99	2.35	Multiple	No	No	445	Alive
9	Female	>60 years	Low-DCP group	2.27	No	0	A	42.5	27.3	14.2	1.23	37.9	296	31	17.31	13.06	2.85	Single	No	No	865	Alive
10	Male	≤60 years	Low-DCP group	7.05	Yes	0	A	40.3	45.2	22.6	1	18.2	142.1	14	16.69	13.44	2	Single	No	No	655	Alive
11	Female	≤60 years	Low-DCP group	15.17	Yes	1	A	27.1	31.1	39.8	1.74	13.6	100.494	9.6314	14.6928	17.4692	1.1	Multiple	No	No	988	Alive
12	Male	≤60 years	High-DCP group	6.02	Yes	1	A	11	26.6	9.7	0.75	18	193.1	20	11.9	13.3	7.05	Multiple	No	No	214	Dead
13	Male	>60 years	Low-DCP group	1.5	Yes	0	A	17.6	19.5	14.2	0.85	24.5	52.1	5	16	19.1	1.4	Single	No	No	798	Alive
14	Male	≤60 years	Low-DCP group	2.33	Yes	0	A	29.4	35.7	17.3	1.27	29.6	130	12	16.7	13.563	4.6	Multiple	No	No	1353	Alive
15	Male	≤60 years	High-DCP group	2.49	Yes	0	A	27.3	46.3	19.5	1.68	42.3	212	15	17.1	12.9	7.15	Multiple	No	No	960	Dead
16	Male	>60 years	High-DCP group	3.26	Yes	0	A	26	35	22.3	1.47	20	171	17	13.5	13.3	2.75	Multiple	No	No	1194	Alive
17	Male	≤60 years	Low-DCP group	3.3	Yes	0	A	32.9	36.3	20.1	1.01	18.3	80	8	15.9	13.2	1.85	Multiple	No	No	1545	Alive
18	Male	≤60 years	Low-DCP group	2.07	No	1	A	22.2	33.9	16	1.77	45.2	125	15	13.9	12.2	2.1	Single	No	No	849	Alive
19	Male	≤60 years	Low-DCP group	7.29	Yes	0	A	35.4	36.7	22.2	1.48	15	75	7	18	13.9	1.4	Single	No	No	1160	Alive
20	Male	≤60 years	Low-DCP group	12.7	No	1	A	19.4	33.3	42	1.56	28.9	133	11	18	12.74	4.1	Multiple	No	No	871	Alive
21	Male	≤60 years	Low-DCP group	2.56	No	0	A	25.4	46.9	38.8	1.78	7.9	53	6	13.8	18.6259	2.8	Single	No	No	1066	Alive
22	Male	>60 years	Low-DCP group	4.33	Yes	1	A	21.2	30	31.6	1.34	5.9	84	11	19.2	14.4	1.1	Multiple	No	No	907	Alive
23	Male	>60 years	High-DCP group	2.59	Yes	0	A	16.4	23.9	13.2	0.8	32.4	130.1	17	18.8	12.8	5.95	Multiple	No	No	330	Alive
24	Male	>60 years	High-DCP group	6.51	No	1	A	19.3	35.4	24.4	1.09	13	94	11	15.2	13	13	Single	No	No	1178	Alive
25	Male	>60 years	High-DCP group	6.99	Yes	0	A	31.9	42.2	12.2	1.32	11.3	51	6	14.3	13	2.8	Single	No	No	1037	Alive
26	Male	≤60 years	Low-DCP group	3.56	Yes	0	A	28.7	24.2	10.8	1.15	29.3	170.703	18.3792	17.7352	13.8654	5.1	Multiple	No	No	862	Alive
27	Male	≤60 years	High-DCP group	9.14	No	1	A	41.5	30	32.3	0.84	14	176	16	16.9	11.2383	19	Multiple	No	No	608	Dead
28	Male	≤60 years	Low-DCP group	10.86	Yes	1	A	95.9	65.5	16.1	0.8	22.7	129	13	15	12.8	1	Multiple	No	No	1289	Dead
29	Male	≤60 years	Low-DCP group	4.44	No	0	A	15.4	22.2	29.5	1.07	19.3	75	8	17.78	14.13	2.6	Multiple	No	No	810	Alive
30	Male	≤60 years	Low-DCP group	3.1	Yes	1	B	39.3	45.1	32.2	1.17	20.7	45	4	17.8	22.6	2.4	Multiple	Yes	No	1432	Alive
31	Male	>60 years	Low-DCP group	3.52	Yes	1	B	27.2	37.5	14.7	0.85	14.1	229	29	15.5	13.7	2.95	Single	Yes	No	1005	Alive
32	Male	≤60 years	High-DCP group	11.35	Yes	1	A	12	25.7	19.8	1.78	25.8	80.1	10	15.3	15	6.65	Multiple	Yes	No	291	Alive
33	Male	≤60 years	Low-DCP group	8.05	Yes	1	A	24.7	36.5	7.9	0.85	22	112	11	17.2	12.4	5.3	Multiple	No	No	743	Dead
34	Male	>60 years	High-DCP group	2.78	Yes	1	B	104.2	67.2	19.2	1.09	13.1	68	7	17.07	12.77	8.35	Multiple	Yes	No	360	Dead
35	Female	≤60 years	High-DCP group	5.41	Yes	1	A	26.7	42.3	9.8	1.26	21.9	213.1	22	11.6	14.6	8	Multiple	Yes	No	197	Dead
36	Male	≤60 years	High-DCP group	2.16	Yes	1	A	41.3	28.3	30.6	0.47	11.6	15.1	1	17.29	15.22	3.7	Multiple	No	No	755	Alive
37	Female	≤60 years	High-DCP group	11.97	Yes	1	A	49.8	72.7	18.2	0.91	8.5	86	9	13.9	13.6	18	Multiple	No	No	1383	Dead
38	Male	≤60 years	High-DCP group	13.29	Yes	0	B	47.3	52.5	18.2	0.92	12.8	97.1	10	17.59	16.33	4.1	Multiple	Yes	No	141	Dead
39	Male	≤60 years	Low-DCP group	5.42	Yes	0	A	22.8	27.3	16.6	0.94	28.4	162	17	13.1	13.8	2.55	Multiple	Yes	No	1220	Alive
40	Female	>60 years	Low-DCP group	1.36	No	0	A	17.7	33.9	11.9	1.7	25.4	195	17	16.5	12.7	7.2	Multiple	Yes	No	864	Dead
41	Male	>60 years	Low-DCP group	15.98	Yes	1	A	52.6	34.5	10	0.88	24	136	13	16.3	13.5	4.3	Single	No	No	1453	Alive
42	Male	≤60 years	High-DCP group	19.71	No	1	A	26.9	25.2	9.6	1.18	25	93	11	14.6	14.2951	2.1	Multiple	Yes	No	556	Dead
43	Male	≤60 years	High-DCP group	1.9	Yes	1	A	31.8	27.6	10.4	1.23	29.6	170	21	20.1	15.6	6.3	Single	No	No	1079	Dead
44	Male	≤60 years	High-DCP group	4.41	Yes	0	B	28.7	29.8	13.1	0.76	51.6	96	11	17.5	14.8	6.2	Multiple	No	No	591	Dead
45	Male	>60 years	Low-DCP group	6.03	No	0	A	24.6	41.1	36.4	1.09	18.8	151.1	15	17.02	16.72	2.2	Single	No	No	587	Alive
46	Male	>60 years	Low-DCP group	5.15	Yes	0	A	31.6	32.3	11.2	1.28	19.9	73	8	16.9	15	6.6	Multiple	No	No	922	Dead
47	Male	≤60 years	Low-DCP group	4.01	Yes	1	A	31.9	64.2	12	1.22	28.1	151	15	11.3	13.5	4	Multiple	No	No	1556	Alive
48	Male	≤60 years	Low-DCP group	9.96	Yes	0	A	18.4	22.3	13.9	0.69	9.3	15.1	2	15.3	20.4	1.4	Multiple	No	No	589	Alive
49	Male	≤60 years	High-DCP group	1.82	Yes	1	A	48.6	61.6	75.1	0.57	10.5	232.1	21	17.03	14.03	2.7	Multiple	Yes	No	168	Dead
50	Male	>60 years	High-DCP group	3.22	Yes	1	B	54.4	54.7	17	0.77	15.7	206	19	15.9	13.4	9.9	Multiple	No	Yes	1530	Alive
51	Male	>60 years	Low-DCP group	15.79	Yes	0	A	13.3	23.6	8.9	0.83	27.5	201.1	23	13.7	12.1	4.5	Multiple	No	No	660	Alive
52	Female	≤60 years	Low-DCP group	9.06	Yes	0	B	21.8	41.8	18.2	1.1	10	92	9	14.2	19.8	1.2	Single	No	No	1361	Dead
53	Male	>60 years	Low-DCP group	1.43	Yes	0	A	18.6	50.1	6.9	1.34	39.1	103	12	14.2	13.3	10.5	Multiple	No	No	877	Alive
54	Male	≤60 years	High-DCP group	5.72	No	1	A	31.7	43.2	11.5	1.54	26.3	160	20	17.4	15.5763	3.5	Multiple	No	No	1466	Alive
55	Male	≤60 years	High-DCP group	2.13	No	1	A	20.7	24.2	11.3	1.1	36	167	17	17.3	13	4.6	Multiple	No	Yes	870	Dead
56	Male	≤60 years	High-DCP group	4.77	Yes	1	A	13.2	28.9	12	1.2	24.9	142.1	17	16.3	13.5	3	Single	No	No	599	Alive
57	Male	>60 years	Low-DCP group	5.62	Yes	0	A	23.9	28.4	12.2	1.05	20.8	100	9	16.1	12.9	14	Multiple	No	No	1418	Alive
58	Male	>60 years	High-DCP group	4.89	Yes	1	A	81.1	91	24.6	1.23	24.9	228	19	16.9	13.24	9.5	Single	Yes	No	851	Alive
59	Male	≤60 years	Low-DCP group	5.65	Yes	0	A	22.6	35.8	12	1.48	44.9	146	13	16.63	13.5	0.9	Multiple	No	No	816	Alive
60	Male	>60 years	Low-DCP group	6.3	Yes	1	A	17.5	25	18.7	1.09	9.6	61	6	11.2	14.3	2.2	Single	Yes	No	1018	Alive
61	Male	>60 years	High-DCP group	4.73	No	0	A	41.6	135.2	28.9	1.11	23	227	25	17.3	15	5.15	Multiple	Yes	No	1338	Alive
62	Male	≤60 years	Low-DCP group	1.18	Yes	0	A	29.3	45.3	15	0.7	15	26	3	13.7	15.1	0.7	Single	No	No	1206	Alive
63	Male	≤60 years	Low-DCP group	10	Yes	0	A	42.9	40.2	24.7	1.05	32.4	128.1	16	16.2	14	1.95	Multiple	No	No	723	Alive
64	Male	≤60 years	Low-DCP group	3.28	Yes	0	A	42.2	46.3	16.7	1.2	18	193.336	16.2893	11.6947	15.9052	3.35	Multiple	No	No	1111	Alive
65	Male	>60 years	Low-DCP group	2.51	No	0	A	12.4	16.1	8.7	1.54	27	267.1	23	9.1	16.7	9.3	Single	No	No	524	Dead
66	Male	>60 years	Low-DCP group	7.88	Yes	0	A	19.1	18.6	20.1	0.93	36	201.1	20	11.8	12.8	3.15	Multiple	No	No	546	Dead
67	Male	≤60 years	High-DCP group	4.52	Yes	0	A	19.4	19.6	10.1	0.86	32.3	180	20	13.6	14	4.9	Single	No	No	1023	Alive
68	Male	≤60 years	Low-DCP group	7.61	Yes	1	A	76.4	62.3	12.7	0.85	16.3	140	14	10.7	11.9	7.5	Multiple	No	No	995	Alive
69	Male	>60 years	Low-DCP group	2.12	No	1	A	60.9	30.7	6.5	1.03	31.8	79	8	10.7	14.4	6.7	Multiple	Yes	Yes	1058	Alive
70	Male	>60 years	High-DCP group	12.59	Yes	1	A	23.1	26.1	10	1.06	21.3	81.9546	10.7808	16.6361	12.4152	3.25	Multiple	No	No	1044	Alive
71	Male	≤60 years	High-DCP group	7.65	Yes	1	A	22.6	34.5	23.8	1.7	28.5	75.1	8	10.9	13.5	3.7	Single	No	No	473	Alive
72	Male	>60 years	High-DCP group	1.82	Yes	0	A	25.8	21.7	13.7	0.93	28	88.1	12	18.9	12.5	2.1	Multiple	No	No	578	Alive
73	Male	≤60 years	High-DCP group	7.03	Yes	1	A	51.3	49.1	16.8	1.05	15.2	30.1	3	18.26	14.68	2.8	Multiple	No	No	139	Dead
74	Male	≤60 years	Low-DCP group	7.46	Yes	1	A	18	39	16.9	0.78	20.3	43	4	16.99	13.09	2.7	Single	Yes	No	512	Dead
75	Male	≤60 years	High-DCP group	9.55	Yes	1	A	43.5	42.5	21.6	0.72	42.4	99.1	10	12.2	13.5	2.7	Single	No	No	730	Alive
76	Male	≤60 years	High-DCP group	3.32	No	1	B	60.5	81.6	259.2	0.29	31.7	102	12	15.2	15.5	1.2	Multiple	Yes	No	492	Dead
77	Male	≤60 years	Low-DCP group	12.51	Yes	1	A	89.9	67.9	16.2	1.39	27.8	128.698	15.4035	18.6838	14.7127	3.6	Multiple	No	No	978	Alive
78	Male	≤60 years	High-DCP group	1.44	Yes	0	A	25.6	20.7	17.2	1.1	38	149	14	17.44	13.27	3.25	Multiple	No	No	830	Alive
79	Male	>60 years	High-DCP group	3.84	Yes	0	A	18.5	35.6	11.3	1.01	20.6	114.1	14	16.3	13.2	0.9	Multiple	No	No	242	Alive
80	Male	>60 years	High-DCP group	1.16	No	1	A	25.6	32.2	15.7	1.06	24.8	159.1	19	16.2	12.6	9	Single	No	No	312	Alive
81	Male	>60 years	Low-DCP group	1.33	No	1	B	17.7	22.4	14.3	1.23	25.8	194.954	21.3693	13.9328	15.455	1.5	Multiple	No	No	365	Alive
82	Male	>60 years	High-DCP group	4.55	No	1	B	138.4	121.1	12.8	1.09	40.8	439.1	47	12.8	17	12.5	Multiple	No	No	480	Dead
83	Male	>60 years	High-DCP group	1.65	Yes	1	A	31	22.9	11	0.97	22.7	92	12	16.91	14.3	4.3	Multiple	No	No	906	Alive
84	Male	>60 years	Low-DCP group	6.23	No	1	A	60.3	54.7	13.9	1.18	27.3	183.1	21	13.2	16.8	1.1	Multiple	No	No	632	Alive
85	Male	≤60 years	Low-DCP group	1.17	No	1	A	13.4	26.2	8.7	1.06	36.6	191.983	20.6518	14.0907	13.9098	12.2	Multiple	Yes	No	520	Dead
86	Male	≤60 years	High-DCP group	13.87	No	0	B	51.3	61	28.3	1.03	16.1	88.1	11	17.6	14.13	4.5	Multiple	Yes	No	200	Dead
87	Female	≤60 years	Low-DCP group	2.25	No	0	A	24.3	26.3	5.3	0.8	33.5	255.404	22.8559	16.3837	12.74	8.4	Single	No	No	841	Alive
88	Male	≤60 years	High-DCP group	3.37	No	1	A	12.3	22.8	10.5	0.98	30.3	146	15	11.4	14.9	7.1	Multiple	Yes	No	489	Dead
89	Male	>60 years	High-DCP group	14.6	Yes	0	A	61.4	33.2	20.6	0.44	4.2	80.1	7	18.02	17.14	8.8	Multiple	Yes	No	699	Alive
90	Female	>60 years	High-DCP group	4.07	No	0	A	15.9	20.6	8.3	1.06	45.6	234.93	24.2611	14.8956	13.7731	6.65	Single	Yes	No	830	Alive
91	Female	>60 years	Low-DCP group	0.82	No	0	A	21.6	31.9	29.4	1.06	6.3	364.1	39	13.4	21.4	2.09386	Single	Yes	No	716	Alive
92	Female	≤60 years	High-DCP group	17.65	Yes	0	B	14.1	41	12	0.83	15.8	146.1	17	14.2	14.1	8.6	Multiple	Yes	No	166	Dead
93	Male	≤60 years	Low-DCP group	2.47	Yes	1	A	19.9	19.3	9.2	0.86	30.5	142.1	12	16.88	13.2	2.05	Multiple	No	No	226	Alive
94	Male	>60 years	High-DCP group	3.63	Yes	1	A	39.7	38.8	24.6	1	13.3	73.1	9	15.3	14	3.4	Multiple	Yes	No	106	Dead
95	Male	≤60 years	High-DCP group	3.17	No	1	A	87.4	62.2	10.8	0.9	19.7	136.1	14	17.59	14.43	7.95	Multiple	No	No	235	Alive
96	Male	≤60 years	Low-DCP group	3.12	Yes	1	A	15.6	22	10.1	0.85	17	60.1	8	19.1	12.6	2.65	Multiple	Yes	No	491	Alive
97	Male	≤60 years	High-DCP group	6.19	Yes	1	A	11	32.1	24.1	1.34	10.9	114.1	14	13.5	15.6	1.5	Single	Yes	No	585	Alive
98	Female	>60 years	High-DCP group	1.52	Yes	1	B	50.7	68.7	22.7	0.69	18	202.1	23	13.3	12.6	12	Multiple	Yes	No	332	Dead
99	Male	≤60 years	High-DCP group	2.43	Yes	1	A	8.1	23.5	9.1	1.27	33	257.1	27	11.5	13.3	12.2	Multiple	No	No	298	Alive
100	Male	>60 years	Low-DCP group	5.79	No	1	B	27	29.1	12.3	0.64	30.7	157.1	18	13.1	12.5	1.9	Single	No	No	459	Alive
101	Male	>60 years	High-DCP group	5.3	Yes	0	B	38.3	45.4	37.5	1.55	22.7	117.1	13	14.6	14	3.75	Multiple	No	No	351	Alive
102	Female	≤60 years	Low-DCP group	2.1	No	1	B	16.3	19	9.7	0.99	26	117.1	13	12.9	12.7	2.2	Multiple	No	No	179	Alive
103	Male	≤60 years	High-DCP group	1.94	No	1	A	25	29.4	22	0.84	35.6	146.1	15	12.7	14.9	1.75	Multiple	No	No	333	Alive
104	Male	≤60 years	Low-DCP group	9.12	Yes	0	B	32.3	37.7	29.5	0.87	9.2	42.1	6	21.4	13.5	2.5	Single	No	No	221	Alive
105	Male	≤60 years	High-DCP group	5.78	No	1	A	46.3	32.6	11.9	1.1	29.2	116.1	13	14.9	12.9	2.6	Multiple	No	No	64	Alive
106	Male	≤60 years	High-DCP group	2.75	No	0	A	69.8	55.2	11.2	0.86	33.6	194.1	23	14.9	13.2	1.2	Single	No	No	197	Alive
107	Male	≤60 years	High-DCP group	4.42	Yes	0	A	30.6	25.3	12.5	0.87	23.7	175.003	18.4634	19.0268	9.69325	2.75	Multiple	No	No	179	Alive
ALT, alanine transaminase; AST, aspartate transaminase; DCP, des-γ-carboxyprothrombin; ECOG, Eastern Cooperative Oncology Group; HDL, high-density lipoprotein; OS, overall survival; PCT, procalcitonin; PDW, platelet distribution width; PLT, platelet count; RBP, retinol binding protein; RDW, red cell distribution width; TBil, total bilirubin.
